# Supplementary material
Source: PubMed Central journal article supplement (PMC3323055)
Supplement: supp_M111.324244_Supplemental_Data.pdf [file supp_M111.324244_Supplemental_Data.pdf]

Supplemental Data

**Cytotoxic Mechanism of Selenomethionine in Yeast**

Toshihiko Kitajima, Yoshifumi Jigami, and Yasunori Chiba

Table of Contents

|                 |     |
|-----------------|-----|
| Figure S1 ..... | S-1 |
| Table S1 .....  | S-2 |
| Table S2 .....  | S-3 |
| Table S3 .....  | S-7 |

## Supplemental Figure

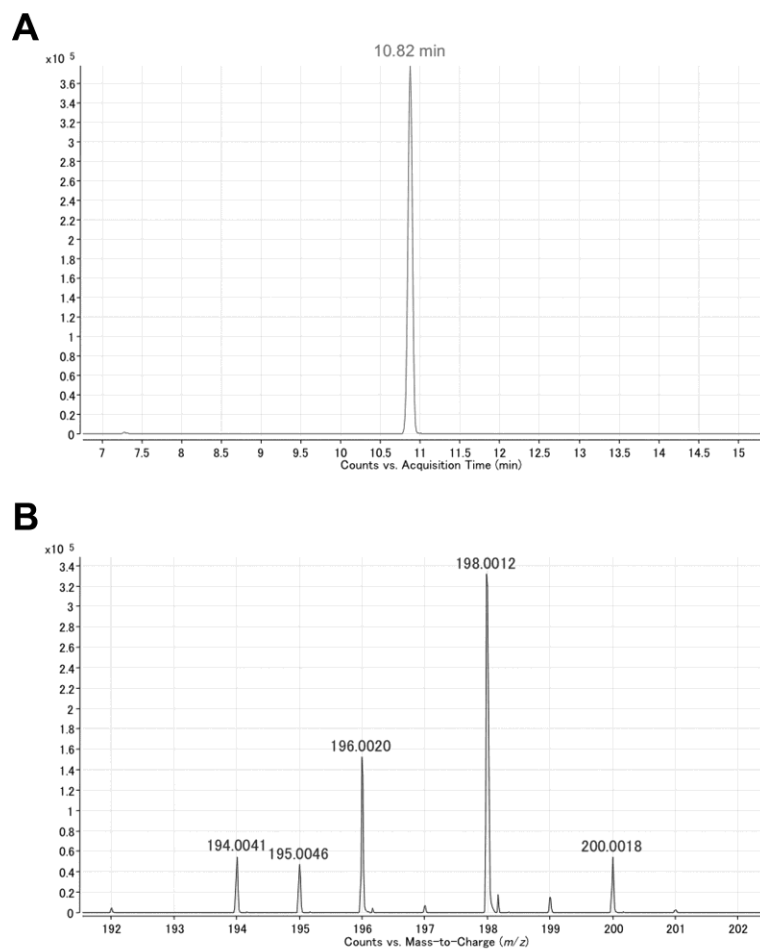

Figure S1. Representative chromatograms of *Se*-compounds in CE-TOFMS analysis. (A) The extracted ion chromatogram at  $m/z$  198.002, corresponding to the protonated ion of SeMet is shown. (B) Mass spectrum of the ion peak at 10.82 min in panel A.

## Supplemental Table

Table S1. Primers used in this study.

| Primers  | Sequence a (5'→3')                       | Restriction enzyme |
|----------|------------------------------------------|--------------------|
| EcCysE-f | GCG <b>CGAGCT</b> CATGTCGTGTGAAGAACTGGA  | <i>SacI</i>        |
| EcCysE-r | GCG <b>CGTCGACT</b> TAGATCCCATCCCCATACT  | <i>SalI</i>        |
| EcCysK-f | <b>CGGAATTC</b> ATGAGTAAGATTTTTGAAGATAAC | <i>EcoRI</i>       |
| EcCysK-r | GCG <b>CGTCGACT</b> TACTGTTGCAATTCTTTCTC | <i>SalI</i>        |
| EcCysM-f | <b>CGGAATTC</b> ATGAGTACATTAGAACAACAATAG | <i>EcoRI</i>       |
| EcCysM-r | GCG <b>CGTCGACT</b> TAAATCCCCGCCCCCTG    | <i>SalI</i>        |

<sup>a</sup>Restriction sites are shown in boldface.

Table S2. Changes in endogenous metabolites after SeMet treatment.

| Candidate compounds                   | mode   | MT <sup>a</sup> | m/z     | Relative Intensity ( $\times 10^{-8}$ ) <sup>b</sup> |            |          |            |          |            |
|---------------------------------------|--------|-----------------|---------|------------------------------------------------------|------------|----------|------------|----------|------------|
|                                       |        |                 |         | 0 min                                                |            | 10 min   |            | 30 min   |            |
| 1-Aminocyclopropane-1-carboxylic acid | Cation | 7.25            | 102.055 | 3.97E-03                                             | ± 1.82E-04 | 6.00E-02 | ± 1.76E-03 | 1.24E-01 | ± 3.99E-03 |
| 1-Methyl-2-pyrrolidone                | Cation | 21.02           | 100.074 | 1.26E-02                                             | ± 5.16E-03 | 2.06E-02 | ± 7.49E-03 | 1.45E-02 | ± 1.99E-03 |
| 1-Methyladenosine                     | Cation | 10.04           | 282.118 | 6.01E-03                                             | ± 3.65E-04 | 6.77E-03 | ± 2.80E-04 | 7.77E-03 | ± 5.45E-04 |
| 2-Amino adipic acid                   | Cation | 11.02           | 162.076 | 4.10E+00                                             | ± 5.13E-02 | 3.91E+00 | ± 1.28E-01 | 4.50E+00 | ± 6.81E-02 |
| 2-Aminobutyric acid                   | Cation | 9.73            | 104.070 | 1.02E-01                                             | ± 5.61E-03 | 1.07E-01 | ± 7.60E-04 | 1.14E-01 | ± 3.39E-03 |
| 3-Aminoisobutyric acid                | Cation | 7.81            | 104.070 | 1.19E-02                                             | ± 5.40E-04 | 1.20E-02 | ± 3.17E-04 | 1.51E-02 | ± 4.18E-04 |
| 3-Aminopropane-1,2-diol               | Cation | 7.56            | 92.069  | 2.22E-03                                             | ± 2.39E-04 | 1.85E-03 | ± 1.55E-04 | 2.33E-03 | ± 1.20E-04 |
| 3-Hydroxykynurenine                   | Cation | 9.78            | 225.086 | 2.40E-02                                             | ± 8.97E-03 | 2.03E-02 | ± 6.24E-03 | 1.87E-02 | ± 5.14E-03 |
| 3-Phenylpropionic acid                | Cation | 21.41           | 151.074 | 7.21E-03                                             | ± 4.48E-04 | 7.33E-03 | ± 2.10E-04 | 6.52E-03 | ± 1.55E-04 |
| 4-Methyl-2-oxopentanoic acid          | Cation | 22.23           | 131.070 | 1.16E-02                                             | ± 1.29E-03 | 1.03E-02 | ± 3.47E-04 | 1.05E-02 | ± 1.32E-03 |
| 5-Amino-4-oxovaleric acid             | Cation | 8.11            | 132.064 | 1.02E-01                                             | ± 3.20E-03 | 9.72E-02 | ± 2.13E-03 | 8.96E-02 | ± 1.43E-03 |
| 5-Aminovaleric acid                   | Cation | 8.17            | 118.087 | 2.33E-02                                             | ± 1.40E-03 | 2.03E-02 | ± 1.68E-03 | 2.14E-02 | ± 1.84E-03 |
| 5-Hydroxylysine                       | Cation | 7.30            | 163.108 | 2.68E-03                                             | ± 3.52E-04 | 2.40E-03 | ± 2.59E-04 | 3.35E-03 | ± 1.09E-04 |
| Adenine                               | Cation | 7.73            | 136.061 | 2.27E-02                                             | ± 4.05E-03 | 9.46E-03 | ± 3.01E-03 | 8.87E-03 | ± 5.61E-04 |
| Adenosine                             | Cation | 9.95            | 268.103 | 2.06E-02                                             | ± 1.07E-03 | 1.89E-02 | ± 2.20E-03 | 1.75E-02 | ± 3.32E-04 |
| ADMA                                  | Cation | 7.80            | 203.149 | 6.24E-03                                             | ± 2.25E-04 | 5.90E-03 | ± 6.36E-04 | 6.94E-03 | ± 4.82E-04 |
| Ala                                   | Cation | 9.12            | 90.055  | 3.10E+00                                             | ± 1.20E-01 | 3.25E+00 | ± 4.65E-02 | 4.67E+00 | ± 1.95E-01 |
| Ala-Ala                               | Cation | 9.37            | 161.092 | 1.43E-02                                             | ± 1.25E-03 | 1.69E-02 | ± 6.17E-04 | 1.97E-02 | ± 8.73E-04 |
| Anthranilic acid                      | Cation | 10.59           | 138.054 | 4.03E-01                                             | ± 1.27E-02 | 3.62E-01 | ± 2.37E-02 | 2.85E-01 | ± 2.55E-02 |
| Arg <sup>c</sup>                      | Cation | 7.21            | 175.119 | 6.59E+00                                             | ± 2.87E-01 | 6.06E+00 | ± 1.23E-01 | 6.86E+00 | ± 2.28E-01 |
| Arg-Glu                               | Cation | 7.64            | 304.160 | 1.14E-02                                             | ± 3.05E-04 | 1.23E-02 | ± 2.81E-04 | 1.56E-02 | ± 3.24E-04 |
| Argininosuccinic acid                 | Cation | 9.52            | 291.129 | 2.78E-02                                             | ± 9.21E-04 | 1.81E-02 | ± 1.72E-03 | 3.10E-02 | ± 9.00E-04 |
| Asn                                   | Cation | 10.47           | 133.060 | 1.19E+00                                             | ± 4.04E-02 | 1.14E+00 | ± 1.21E-02 | 1.43E+00 | ± 4.55E-02 |
| Asp                                   | Cation | 11.55           | 134.045 | 6.08E+00                                             | ± 3.81E-01 | 5.34E+00 | ± 9.32E-02 | 7.04E+00 | ± 1.43E-01 |
| Butyric acid                          | Cation | 21.18           | 89.060  | 4.89E-02                                             | ± 4.10E-03 | 4.86E-02 | ± 4.00E-03 | 5.40E-02 | ± 1.66E-03 |
| Carnosine                             | Cation | 6.88            | 227.112 | 2.44E-03                                             | ± 1.52E-04 | 3.52E-03 | ± 3.54E-04 | 3.78E-03 | ± 5.00E-04 |
| Choline                               | Cation | 6.85            | 104.107 | 7.21E-03                                             | ± 9.34E-04 | 1.68E-02 | ± 4.57E-03 | 8.12E-03 | ± 1.28E-03 |
| Citrulline                            | Cation | 11.07           | 176.102 | 3.31E+00                                             | ± 3.75E-01 | 3.26E+00 | ± 2.87E-01 | 3.53E+00 | ± 3.50E-01 |
| Cyclohexylamine                       | Cation | 7.83            | 100.112 | 2.15E-02                                             | ± 3.00E-03 | 2.03E-02 | ± 3.82E-04 | 2.22E-02 | ± 2.05E-03 |
| Cystathionine                         | Cation | 9.98            | 223.074 | 1.01E-01                                             | ± 3.00E-03 | 1.87E-01 | ± 4.76E-03 | 9.24E-02 | ± 3.11E-03 |
| Cysteine-glutathione disulphide       | Cation | 11.65           | 427.094 | 5.48E-03                                             | ± 1.64E-04 | 1.69E-02 | ± 1.14E-03 | 7.86E-03 | ± 3.48E-04 |
| Cytidine                              | Cation | 9.77            | 244.092 | 3.87E-02                                             | ± 2.95E-03 | 4.31E-02 | ± 2.51E-03 | 6.92E-02 | ± 4.67E-03 |
| Diethanolamine                        | Cation | 7.76            | 106.086 | 6.39E-03                                             | ± 7.41E-04 | 5.47E-03 | ± 5.22E-04 | 5.48E-03 | ± 5.42E-04 |
| Diphenylcarbazine                     | Cation | 21.17           | 243.123 | 3.30E-02                                             | ± 2.99E-03 | 4.84E-02 | ± 6.19E-03 | 4.19E-02 | ± 9.79E-03 |
| Dyphylline                            | Cation | 21.24           | 255.109 | 2.03E-01                                             | ± 2.94E-02 | 1.12E-01 | ± 2.26E-02 | 9.93E-02 | ± 4.99E-03 |
| Gln <sup>c</sup>                      | Cation | 10.75           | 147.077 | 1.58E+01                                             | ± 3.91E-02 | 1.46E+01 | ± 3.09E-01 | 1.54E+01 | ± 1.02E-01 |
| Glu <sup>c</sup>                      | Cation | 10.92           | 148.062 | 2.41E+01                                             | ± 4.22E-01 | 2.01E+01 | ± 7.36E-01 | 2.45E+01 | ± 1.88E-01 |
| Glu-Glu                               | Cation | 10.88           | 277.103 | 5.63E-03                                             | ± 6.17E-04 | 6.66E-03 | ± 6.22E-04 | 9.11E-03 | ± 2.05E-04 |
| Glutaric acid                         | Cation | 21.39           | 133.050 | 3.09E-02                                             | ± 1.69E-03 | 2.44E-02 | ± 4.08E-03 | 2.72E-02 | ± 6.88E-04 |
| Glutathione (GSH)                     | Cation | 13.15           | 308.092 | 8.32E-01                                             | ± 6.34E-02 | 5.86E-03 | ± 7.88E-04 | 4.92E-02 | ± 4.71E-02 |
| Glutathione (GSSG) <sup>d</sup>       | Cation | 12.16           | 307.082 | 5.02E-01                                             | ± 5.29E-02 | 8.70E-01 | ± 3.37E-02 | 9.05E-01 | ± 1.03E-02 |
| Gly                                   | Cation | 8.42            | 76.039  | 1.77E+00                                             | ± 1.52E-01 | 1.22E+00 | ± 8.10E-02 | 1.01E+00 | ± 9.03E-02 |
| Gly-Gly                               | Cation | 8.49            | 133.059 | 5.19E-03                                             | ± 4.21E-04 | 4.96E-03 | ± 2.21E-04 | 5.28E-03 | ± 2.80E-04 |
| Gly-Leu                               | Cation | 9.88            | 189.122 | 9.93E-02                                             | ± 8.14E-03 | 1.05E-01 | ± 3.15E-03 | 1.20E-01 | ± 3.61E-03 |
| Glycerophosphocholine                 | Cation | 20.84           | 258.109 | 1.72E-02                                             | ± 1.29E-03 | 1.99E-02 | ± 1.88E-03 | 5.37E-02 | ± 4.87E-03 |
| Guanine                               | Cation | 8.41            | 152.056 | 1.85E-02                                             | ± 2.11E-03 | 1.96E-02 | ± 1.13E-03 | 2.03E-02 | ± 9.27E-04 |
| Guanosine                             | Cation | 12.45           | 284.098 | 4.65E-02                                             | ± 4.01E-03 | 4.37E-02 | ± 2.06E-03 | 5.81E-02 | ± 1.86E-03 |
| Hexylamine                            | Cation | 7.72            | 102.127 | 5.46E-02                                             | ± 1.58E-02 | 4.97E-02 | ± 7.75E-03 | 5.07E-02 | ± 8.55E-03 |
| His                                   | Cation | 7.41            | 156.076 | 3.37E+00                                             | ± 3.10E-01 | 3.37E+00 | ± 2.34E-01 | 3.86E+00 | ± 3.48E-01 |
| His-Glu                               | Cation | 7.71            | 285.118 | 4.98E-03                                             | ± 6.87E-06 | 5.42E-03 | ± 2.60E-04 | 7.61E-03 | ± 1.90E-04 |
| Homocysteine                          | Cation | 10.47           | 136.043 | 4.46E-03                                             | ± 7.13E-04 | N.D.     |            | N.D.     |            |
| Homoserine                            | Cation | 10.13           | 120.065 | 8.18E-01                                             | ± 3.27E-02 | 8.22E-01 | ± 1.93E-02 | 9.57E-01 | ± 7.85E-03 |
| Homoserinelactone                     | Cation | 7.04            | 102.055 | 1.08E-03                                             | ± 9.43E-05 | 8.51E-02 | ± 1.32E-03 | 1.74E-01 | ± 1.14E-02 |
| Hypoxanthine                          | Cation | 11.06           | 137.045 | 2.74E-01                                             | ± 1.24E-02 | 3.02E-01 | ± 2.13E-02 | 2.95E-01 | ± 1.54E-02 |
| Ile                                   | Cation | 10.28           | 132.101 | 3.10E+00                                             | ± 7.61E-02 | 3.08E+00 | ± 1.35E-01 | 2.64E+00 | ± 5.57E-02 |
| Inosine                               | Cation | 18.92           | 269.087 | 8.08E-01                                             | ± 6.40E-02 | 7.20E-01 | ± 3.09E-02 | 8.19E-01 | ± 2.59E-02 |
| Kynurenine                            | Cation | 9.93            | 209.092 | 9.23E-03                                             | ± 2.77E-03 | 8.07E-03 | ± 1.92E-03 | 5.91E-03 | ± 9.49E-04 |
| Leu <sup>c</sup>                      | Cation | 10.37           | 132.102 | 1.27E+01                                             | ± 2.18E-01 | 1.13E+01 | ± 3.00E-01 | 7.79E+00 | ± 1.05E-01 |
| Lys <sup>c</sup>                      | Cation | 6.89            | 147.116 | 3.53E+01                                             | ± 1.39E+00 | 3.32E+01 | ± 4.66E-01 | 3.48E+01 | ± 1.17E+00 |
| Mannosamine                           | Cation | 9.10            | 180.086 | 4.31E-03                                             | ± 6.88E-04 | 1.59E-03 | ± 2.64E-04 | 1.51E-03 | ± 2.15E-04 |

(Continued on next page)

(Continued)

| Candidate compounds                                                                    | mode   | MT <sup>a</sup> | <i>m/z</i> | Relative Intensity ( $\times 10^{-8}$ ) <sup>b</sup> |            |          |            |          |            |
|----------------------------------------------------------------------------------------|--------|-----------------|------------|------------------------------------------------------|------------|----------|------------|----------|------------|
|                                                                                        |        |                 |            | 0 min                                                |            | 10 min   |            | 30 min   |            |
| Mesalamine                                                                             | Cation | 10.82           | 154.049    | 4.08E-03                                             | ± 4.49E-04 | 2.33E-03 | ± 1.23E-04 | 1.55E-03 | ± 3.58E-04 |
| Met                                                                                    | Cation | 10.73           | 150.058    | 1.60E-01                                             | ± 8.28E-03 | 1.36E-01 | ± 5.05E-03 | 7.28E-02 | ± 1.71E-03 |
| <i>N</i> -Acetylhistidine                                                              | Cation | 9.91            | 198.086    | 1.55E-02                                             | ± 6.24E-04 | 1.41E-02 | ± 2.72E-04 | 1.32E-02 | ± 1.94E-04 |
| <i>N</i> -Acetylmethionine                                                             | Cation | 9.67            | 175.107    | 3.09E-01                                             | ± 1.46E-02 | 3.30E-01 | ± 2.82E-02 | 3.53E-01 | ± 2.57E-02 |
| <i>N</i> -Acetylputrescine                                                             | Cation | 8.57            | 131.117    | 7.58E-02                                             | ± 3.14E-03 | 6.69E-02 | ± 4.98E-03 | 6.41E-02 | ± 2.80E-03 |
| <i>N</i> -Ethylglycine                                                                 | Cation | 10.07           | 104.070    | 5.04E-03                                             | ± 7.18E-04 | 4.03E-03 | ± 8.57E-04 | 3.39E-03 | ± 2.84E-04 |
| <i>N</i> -Methylproline                                                                | Cation | 12.93           | 130.086    | 9.57E-03                                             | ± 2.45E-03 | 8.71E-03 | ± 3.08E-03 | 8.50E-03 | ± 2.32E-03 |
| <i>N</i> <sup>6</sup> -Acetyllysine                                                    | Cation | 11.45           | 189.122    | 3.51E-01                                             | ± 8.49E-03 | 3.36E-01 | ± 1.43E-02 | 3.28E-01 | ± 1.35E-02 |
| <i>N</i> <sup>6</sup> , <i>N</i> <sup>6</sup> , <i>N</i> <sup>6</sup> -Trimethyllysine | Cation | 7.30            | 189.158    | 7.63E-03                                             | ± 7.28E-04 | 9.65E-03 | ± 1.10E-03 | 1.12E-02 | ± 1.08E-03 |
| Ophthalmic acid                                                                        | Cation | 13.15           | 290.133    | 1.23E-02                                             | ± 8.60E-04 | 1.14E-02 | ± 2.30E-04 | 1.36E-02 | ± 6.20E-04 |
| Ornithine <sup>c</sup>                                                                 | Cation | 6.85            | 133.098    | 8.04E+00                                             | ± 2.24E-01 | 8.10E+00 | ± 3.64E-01 | 9.68E+00 | ± 2.29E-01 |
| <i>p</i> -Aminobenzoic acid                                                            | Cation | 9.73            | 138.054    | 6.48E-03                                             | ± 6.79E-04 | 6.49E-03 | ± 3.23E-04 | 4.89E-03 | ± 3.04E-04 |
| Pantothenic acid                                                                       | Cation | 21.35           | 220.117    | 1.28E-02                                             | ± 1.25E-03 | 1.30E-02 | ± 5.49E-04 | 1.73E-02 | ± 5.82E-04 |
| Phe                                                                                    | Cation | 11.12           | 166.086    | 1.85E+00                                             | ± 2.43E-01 | 2.02E+00 | ± 2.17E-01 | 1.78E+00 | ± 1.64E-01 |
| Phosphorylcholine                                                                      | Cation | 19.90           | 184.072    | 1.11E-02                                             | ± 1.59E-03 | 9.28E-03 | ± 4.37E-04 | 8.87E-03 | ± 3.39E-04 |
| Pimelic acid                                                                           | Cation | 21.39           | 161.080    | 1.90E-02                                             | ± 8.78E-04 | 1.70E-02 | ± 1.52E-03 | 1.89E-02 | ± 1.40E-03 |
| Pro                                                                                    | Cation | 10.85           | 116.070    | 1.47E+00                                             | ± 8.54E-03 | 9.83E-01 | ± 3.16E-02 | 9.91E-01 | ± 2.07E-02 |
| Putrescine                                                                             | Cation | 4.82            | 89.107     | 2.20E-03                                             | ± 4.48E-04 | 1.16E-03 | ± 1.68E-04 | 1.16E-03 | ± 1.89E-04 |
| Pyridine-2-carboxylic acid butyl ester                                                 | Cation | 10.30           | 180.101    | 1.16E-02                                             | ± 1.68E-03 | 1.21E-02 | ± 3.47E-03 | 9.40E-03 | ± 2.67E-03 |
| Pyridoxal                                                                              | Cation | 8.90            | 168.065    | 2.73E-03                                             | ± 1.46E-04 | 3.33E-03 | ± 1.76E-04 | 3.28E-03 | ± 1.92E-04 |
| <i>S</i> -Adenosylhomocysteine                                                         | Cation | 8.85            | 385.127    | 9.88E-03                                             | ± 4.20E-04 | 1.36E-02 | ± 1.70E-03 | 7.92E-03 | ± 9.20E-04 |
| <i>S</i> -Adenosylmethionine                                                           | Cation | 7.21            | 399.143    | 2.75E-02                                             | ± 6.65E-04 | 1.76E-02 | ± 7.08E-04 | 2.15E-02 | ± 1.43E-03 |
| Saccharopine                                                                           | Cation | 10.77           | 277.138    | 3.06E-02                                             | ± 1.85E-03 | 2.66E-02 | ± 3.48E-03 | 3.73E-02 | ± 1.70E-03 |
| Ser                                                                                    | Cation | 10.05           | 106.050    | 1.57E+00                                             | ± 1.95E-02 | 1.35E+00 | ± 4.05E-02 | 1.21E+00 | ± 2.75E-02 |
| Ser-Glu                                                                                | Cation | 10.43           | 235.092    | 5.83E-03                                             | ± 8.16E-05 | 8.27E-03 | ± 4.70E-04 | 1.03E-02 | ± 5.80E-04 |
| Spermidine                                                                             | Cation | 4.64            | 146.165    | 3.21E-03                                             | ± 3.14E-04 | 3.36E-03 | ± 6.28E-04 | 4.06E-03 | ± 4.08E-04 |
| Syringic acid                                                                          | Cation | 21.17           | 199.055    | 1.89E-02                                             | ± 3.52E-03 | 2.10E-02 | ± 4.85E-03 | 3.18E-02 | ± 5.91E-03 |
| Thiamine                                                                               | Cation | 6.72            | 265.110    | 3.23E-01                                             | ± 6.26E-03 | 2.90E-01 | ± 1.16E-02 | 3.05E-01 | ± 8.69E-03 |
| Thiamine phosphate                                                                     | Cation | 10.72           | 345.077    | 2.87E-03                                             | ± 2.49E-04 | 2.83E-03 | ± 2.35E-04 | 3.53E-03 | ± 2.72E-04 |
| trans-Glutaconic acid                                                                  | Cation | 21.93           | 131.034    | 1.31E-02                                             | ± 1.34E-03 | 7.03E-03 | ± 4.91E-04 | 6.22E-03 | ± 5.61E-04 |
| Triethanolamine                                                                        | Cation | 8.36            | 150.112    | 6.69E-03                                             | ± 1.78E-03 | 7.08E-03 | ± 2.87E-04 | 7.50E-03 | ± 1.35E-03 |
| Trimethylamine <i>N</i> -oxide                                                         | Cation | 6.83            | 76.073     | 3.83E-03                                             | ± 4.36E-04 | 4.09E-03 | ± 8.50E-04 | 3.61E-03 | ± 2.82E-04 |
| Trp                                                                                    | Cation | 11.01           | 205.096    | 1.60E-01                                             | ± 2.51E-02 | 1.78E-01 | ± 2.13E-02 | 1.88E-01 | ± 2.42E-02 |
| Tyr                                                                                    | Cation | 11.38           | 182.080    | 8.34E-01                                             | ± 1.42E-01 | 9.36E-01 | ± 1.26E-01 | 1.22E+00 | ± 1.52E-01 |
| Tyr-Arg <sup>d</sup>                                                                   | Cation | 7.86            | 169.594    | 1.78E-03                                             | ± 1.69E-04 | 1.83E-03 | ± 3.11E-04 | 2.44E-03 | ± 1.97E-04 |
| Tyr-Glu                                                                                | Cation | 11.10           | 311.122    | 2.50E-03                                             | ± 3.43E-04 | 2.99E-03 | ± 3.40E-04 | 4.54E-03 | ± 1.84E-04 |
| Uracil                                                                                 | Cation | 21.18           | 113.035    | 3.04E-02                                             | ± 4.86E-04 | 3.48E-02 | ± 1.43E-03 | 3.70E-02 | ± 1.07E-03 |
| Urea                                                                                   | Cation | 20.35           | 61.039     | 1.63E-01                                             | ± 2.32E-02 | 9.89E-02 | ± 1.10E-02 | 1.07E-01 | ± 1.51E-02 |
| Uridine                                                                                | Cation | 21.22           | 245.079    | 9.23E-02                                             | ± 9.05E-03 | 1.02E-01 | ± 4.00E-03 | 1.21E-01 | ± 6.45E-03 |
| Urocanic acid                                                                          | Cation | 8.40            | 139.049    | 8.19E-03                                             | ± 1.97E-03 | N.D.     |            | N.D.     |            |
| Val <sup>e</sup>                                                                       | Cation | 10.09           | 118.086    | 7.56E+00                                             | ± 2.28E-01 | 7.93E+00 | ± 1.98E-01 | 7.17E+00 | ± 1.47E-01 |
| β-Ala                                                                                  | Cation | 7.43            | 90.054     | 4.94E-03                                             | ± 3.69E-04 | 3.86E-03 | ± 1.03E-03 | 4.53E-03 | ± 3.87E-04 |
| β-Ala-Lys                                                                              | Cation | 6.84            | 218.149    | 1.23E-02                                             | ± 5.62E-04 | 1.25E-02 | ± 7.37E-04 | 1.51E-02 | ± 4.39E-04 |
| γ-Glu-2-aminobutanoic acid                                                             | Cation | 12.49           | 233.112    | 9.57E-03                                             | ± 5.54E-05 | 9.90E-03 | ± 3.02E-04 | 1.27E-02 | ± 5.24E-04 |
| γ-Glu-Cys                                                                              | Cation | 12.76           | 251.069    | 5.18E-02                                             | ± 2.83E-03 | N.D.     |            | N.D.     |            |
| 10-Hydroxydecanoic acid                                                                | Anion  | 7.65            | 187.135    | 4.41E-03                                             | ± 7.22E-05 | 3.46E-03 | ± 2.64E-04 | 3.49E-03 | ± 3.30E-04 |
| 2-Carboxybenzaldehyde                                                                  | Anion  | 9.49            | 149.024    | 2.14E-03                                             | ± 7.67E-05 | 2.60E-03 | ± 4.42E-04 | 2.48E-03 | ± 2.83E-04 |
| 2-Deoxyribose 1-phosphate                                                              | Anion  | 10.95           | 213.016    | 3.24E-02                                             | ± 2.32E-03 | 3.10E-02 | ± 3.04E-03 | 3.12E-02 | ± 3.39E-03 |
| 2-Furoic acid                                                                          | Anion  | 10.40           | 111.008    | 1.04E-02                                             | ± 6.79E-04 | 9.38E-03 | ± 6.20E-04 | 9.01E-03 | ± 6.80E-04 |
| 2-Hydroxy-4-methylpentanoic acid                                                       | Anion  | 8.99            | 131.071    | 1.05E-02                                             | ± 3.76E-04 | 7.82E-03 | ± 5.02E-04 | 6.95E-03 | ± 1.44E-04 |
| 2-Hydroxybutyric acid                                                                  | Anion  | 9.90            | 103.040    | 2.94E-03                                             | ± 2.47E-04 | 2.39E-03 | ± 1.84E-04 | 2.76E-03 | ± 2.17E-04 |
| 2-Hydroxyoctanoic acid                                                                 | Anion  | 8.08            | 159.102    | 5.29E-03                                             | ± 3.58E-04 | 4.07E-03 | ± 2.19E-04 | 4.70E-03 | ± 1.51E-04 |
| 2-Hydroxypentanoic acid                                                                | Anion  | 9.17            | 117.055    | 6.08E-02                                             | ± 1.62E-03 | 4.45E-02 | ± 7.50E-03 | 6.06E-02 | ± 3.67E-03 |
| 2-Isopropylmalic acid                                                                  | Anion  | 13.83           | 175.060    | 9.70E-02                                             | ± 3.31E-03 | 8.58E-02 | ± 6.01E-03 | 7.24E-02 | ± 6.09E-03 |
| 2-Oxoglutaric acid                                                                     | Anion  | 21.80           | 145.014    | 5.22E-02                                             | ± 7.56E-03 | 3.88E-02 | ± 4.67E-03 | 5.35E-02 | ± 4.78E-03 |
| 2-Oxoisovaleric acid                                                                   | Anion  | 10.20           | 115.039    | 1.69E-03                                             | ± 1.50E-04 | 9.74E-04 | ± 1.73E-04 | 1.36E-03 | ± 2.31E-04 |
| 2,3-Diphosphoglyceric acid                                                             | Anion  | 18.67           | 264.950    | 1.76E-02                                             | ± 1.04E-03 | 1.55E-02 | ± 4.43E-04 | 1.31E-02 | ± 3.53E-05 |
| 2,3-Pyridinedicarboxylic acid                                                          | Anion  | 15.82           | 166.014    | 2.41E-03                                             | ± 2.09E-04 | 2.07E-03 | ± 1.07E-04 | 1.86E-03 | ± 6.48E-05 |
| 3-Hydroxy-3-methylglutaric acid                                                        | Anion  | 15.58           | 161.044    | 2.01E-03                                             | ± 1.75E-04 | 1.83E-03 | ± 2.19E-04 | 2.05E-03 | ± 7.77E-05 |
| 3-Hydroxybutyric acid                                                                  | Anion  | 9.57            | 103.040    | 1.36E-02                                             | ± 9.28E-05 | 1.12E-02 | ± 9.85E-04 | 1.36E-02 | ± 7.57E-04 |

(Continued on next page)

(Continued)

| Candidate compounds                     | mode  | MT <sup>a</sup> | <i>m/z</i> | Relative Intensity ( $\times 10^{-8}$ ) <sup>b</sup> |            |          |            |          |            |
|-----------------------------------------|-------|-----------------|------------|------------------------------------------------------|------------|----------|------------|----------|------------|
|                                         |       |                 |            | 0 min                                                |            | 10 min   |            | 30 min   |            |
| 3-Phosphoglyceric acid                  | Anion | 19.86           | 184.985    | 2.04E-01                                             | ± 7.24E-03 | 1.65E-01 | ± 6.51E-03 | 1.35E-01 | ± 6.10E-03 |
| 4-Acetylbutyric acid                    | Anion | 9.13            | 129.055    | 4.83E-02                                             | ± 2.35E-03 | 3.67E-02 | ± 4.20E-03 | 4.54E-02 | ± 4.48E-03 |
| 4-Methylbenzoic acid                    | Anion | 9.20            | 135.044    | 6.55E-01                                             | ± 1.29E-02 | 5.19E-01 | ± 3.67E-02 | 6.16E-01 | ± 2.27E-02 |
| 4-Oxovaleric acid                       | Anion | 9.74            | 115.040    | 1.19E-02                                             | ± 2.38E-04 | 9.52E-03 | ± 7.92E-04 | 1.11E-02 | ± 3.27E-04 |
| 5-Aminoimidazole-4-carboxamide ribotide | Anion | 9.48            | 337.054    | 2.70E-03                                             | ± 4.31E-04 | 1.60E-03 | ± 1.67E-04 | 1.19E-03 | ± 1.31E-04 |
| 5-Oxoproline                            | Anion | 9.52            | 128.035    | 4.89E-02                                             | ± 2.78E-03 | 3.91E-02 | ± 8.90E-04 | 3.63E-02 | ± 1.82E-03 |
| 6-Phosphogluconic acid                  | Anion | 14.73           | 275.016    | 3.17E-03                                             | ± 1.96E-04 | 2.65E-03 | ± 1.49E-04 | 8.42E-03 | ± 6.29E-04 |
| Acetyl CoA <sup>d</sup>                 | Anion | 10.26           | 403.554    | 2.96E-02                                             | ± 2.08E-03 | 2.99E-02 | ± 1.12E-03 | 3.44E-02 | ± 1.13E-03 |
| Adenylosuccinic acid                    | Anion | 13.80           | 462.065    | 2.62E-03                                             | ± 4.38E-04 | 2.05E-03 | ± 4.39E-04 | 1.74E-03 | ± 4.33E-04 |
| ADP                                     | Anion | 10.88           | 426.020    | 2.23E-01                                             | ± 2.56E-03 | 2.24E-01 | ± 1.04E-02 | 2.52E-01 | ± 4.44E-03 |
| AMP                                     | Anion | 9.40            | 346.054    | 1.74E-01                                             | ± 1.09E-02 | 1.74E-01 | ± 2.69E-02 | 1.26E-01 | ± 2.39E-02 |
| Aniline                                 | Anion | 9.71            | 92.050     | 7.56E-03                                             | ± 4.33E-04 | 6.97E-03 | ± 4.76E-04 | 5.75E-03 | ± 3.46E-04 |
| ATP                                     | Anion | 11.77           | 505.988    | 1.97E-01                                             | ± 1.45E-02 | 1.69E-01 | ± 2.43E-02 | 3.75E-01 | ± 3.94E-02 |
| Azelaic acid                            | Anion | 12.14           | 187.096    | 1.67E-03                                             | ± 3.05E-06 | 1.65E-03 | ± 5.14E-05 | 1.76E-03 | ± 1.68E-04 |
| Benzoic acid                            | Anion | 9.86            | 121.029    | 9.99E-02                                             | ± 4.17E-03 | 9.89E-02 | ± 1.05E-02 | 9.61E-02 | ± 4.14E-03 |
| CDP                                     | Anion | 11.47           | 402.009    | 3.53E-02                                             | ± 1.42E-03 | 3.90E-02 | ± 2.24E-03 | 4.40E-02 | ± 4.25E-03 |
| CDP-choline                             | Anion | 6.77            | 487.100    | 8.47E-04                                             | ± 2.23E-04 | 9.72E-04 | ± 3.29E-04 | 7.95E-04 | ± 2.03E-04 |
| Cimetidine                              | Anion | 5.35            | 251.107    | 2.29E-03                                             | ± 1.24E-04 | 2.20E-03 | ± 1.36E-04 | 2.30E-03 | ± 1.50E-04 |
| <i>cis</i> -Aconitic acid               | Anion | 28.14           | 173.008    | 1.08E-02                                             | ± 8.44E-04 | 7.54E-03 | ± 1.74E-03 | 9.03E-03 | ± 5.44E-05 |
| Citric acid                             | Anion | 26.50           | 191.019    | 6.65E-01                                             | ± 4.43E-02 | 5.41E-01 | ± 4.61E-02 | 5.49E-01 | ± 5.39E-02 |
| CMP                                     | Anion | 9.60            | 322.043    | 1.92E-02                                             | ± 3.07E-03 | 1.83E-02 | ± 4.40E-03 | 1.41E-02 | ± 2.94E-03 |
| CMP- <i>N</i> -acetylneuraminate        | Anion | 8.30            | 613.144    | 1.07E-02                                             | ± 6.79E-04 | 1.66E-02 | ± 2.83E-04 | 1.66E-02 | ± 6.85E-04 |
| CoA <sup>d</sup>                        | Anion | 10.60           | 382.548    | 3.05E-03                                             | ± 4.74E-04 | N.D.     |            | N.D.     |            |
| CTP                                     | Anion | 12.35           | 481.976    | 3.67E-02                                             | ± 2.95E-03 | 4.02E-02 | ± 6.61E-03 | 1.01E-01 | ± 1.14E-02 |
| Cyclohexanecarboxylic acid              | Anion | 8.69            | 127.076    | 6.51E-03                                             | ± 4.73E-04 | 5.60E-03 | ± 1.59E-04 | 6.36E-03 | ± 4.78E-04 |
| dADP                                    | Anion | 10.98           | 410.025    | 1.70E-03                                             | ± 1.32E-04 | 1.42E-03 | ± 4.86E-05 | 1.22E-03 | ± 8.62E-05 |
| dATP                                    | Anion | 11.73           | 489.992    | 1.58E-03                                             | ± 1.09E-04 | 1.27E-03 | ± 1.28E-04 | 2.18E-03 | ± 2.78E-04 |
| dCDP                                    | Anion | 11.62           | 386.014    | 1.68E-03                                             | ± 3.55E-05 | 1.36E-03 | ± 1.32E-04 | 1.18E-03 | ± 1.44E-04 |
| dCTP                                    | Anion | 12.47           | 465.763    | 7.69E-04                                             | ± 4.49E-04 | 1.19E-03 | ± 2.48E-04 | 2.21E-03 | ± 1.24E-04 |
| Decanoic acid                           | Anion | 7.90            | 171.139    | 2.45E-02                                             | ± 2.79E-03 | 2.21E-02 | ± 8.22E-04 | 2.10E-02 | ± 2.24E-03 |
| Dihydroxyacetone phosphate              | Anion | 12.69           | 168.990    | 1.46E-02                                             | ± 6.56E-04 | 1.32E-02 | ± 8.33E-04 | 2.56E-02 | ± 3.09E-03 |
| Dodecanedioic acid                      | Anion | 10.74           | 229.143    | 1.72E-03                                             | ± 7.19E-05 | 1.34E-03 | ± 7.52E-05 | 1.44E-03 | ± 9.39E-05 |
| dTDP                                    | Anion | 11.30           | 401.014    | 3.55E-03                                             | ± 1.40E-04 | 2.86E-03 | ± 2.74E-04 | 2.53E-03 | ± 1.68E-04 |
| dTMP                                    | Anion | 9.57            | 321.048    | 1.04E-03                                             | ± 1.58E-04 | 8.41E-04 | ± 2.58E-04 | 5.97E-04 | ± 1.19E-04 |
| dTTP                                    | Anion | 12.10           | 480.981    | 2.61E-03                                             | ± 1.83E-04 | 2.32E-03 | ± 3.70E-04 | 4.26E-03 | ± 5.72E-04 |
| Ethanolamine phosphate                  | Anion | 7.99            | 140.011    | 4.41E-03                                             | ± 1.99E-04 | 2.84E-03 | ± 1.48E-04 | 2.88E-03 | ± 1.07E-04 |
| FAD <sup>d</sup>                        | Anion | 7.84            | 391.570    | 1.85E-03                                             | ± 2.26E-04 | 1.87E-03 | ± 1.58E-04 | 2.18E-03 | ± 1.07E-04 |
| Fructose 1,6-diphosphate                | Anion | 14.65           | 338.987    | 3.85E-02                                             | ± 9.92E-04 | 3.16E-02 | ± 1.87E-03 | 8.27E-02 | ± 9.46E-03 |
| Fructose 6-phosphate                    | Anion | 9.93            | 259.022    | 3.11E-02                                             | ± 4.23E-03 | 2.15E-02 | ± 1.67E-03 | 3.73E-02 | ± 4.33E-03 |
| Fumaric acid                            | Anion | 25.88           | 115.003    | 3.73E-02                                             | ± 8.55E-04 | 2.70E-02 | ± 3.59E-04 | 3.48E-02 | ± 1.48E-04 |
| Ganciclovir                             | Anion | 5.73            | 254.086    | 1.59E-02                                             | ± 2.29E-03 | 1.20E-02 | ± 1.76E-04 | 1.15E-02 | ± 1.62E-04 |
| GDP                                     | Anion | 10.63           | 442.016    | 7.29E-02                                             | ± 1.37E-03 | 8.10E-02 | ± 1.32E-03 | 8.38E-02 | ± 4.51E-03 |
| GDP-mannose                             | Anion | 8.29            | 604.070    | 4.91E-03                                             | ± 3.20E-04 | 4.86E-03 | ± 3.50E-04 | 2.76E-02 | ± 1.24E-03 |
| Gluconic acid                           | Anion | 8.12            | 195.050    | 3.74E-03                                             | ± 6.52E-05 | 3.66E-03 | ± 2.87E-04 | 4.74E-03 | ± 1.40E-04 |
| Glucose 1-phosphate                     | Anion | 10.15           | 259.022    | 3.41E-02                                             | ± 3.53E-03 | 1.13E-02 | ± 4.01E-03 | 1.66E-02 | ± 1.49E-02 |
| Glucose 6-phosphate                     | Anion | 9.85            | 259.021    | 2.15E-02                                             | ± 9.71E-04 | 1.68E-02 | ± 1.55E-03 | 3.09E-02 | ± 4.69E-03 |
| Gly-Asp                                 | Anion | 9.65            | 189.051    | 3.33E-03                                             | ± 1.53E-04 | 3.35E-03 | ± 1.01E-04 | 3.93E-03 | ± 3.21E-04 |
| Glyceric acid                           | Anion | 10.36           | 105.019    | 1.01E-02                                             | ± 4.28E-04 | 9.82E-03 | ± 6.55E-04 | 9.52E-03 | ± 2.95E-04 |
| Glycerol-3-phosphate                    | Anion | 12.13           | 171.005    | 2.69E-02                                             | ± 3.04E-03 | 2.20E-02 | ± 4.58E-03 | 2.57E-02 | ± 4.36E-03 |
| GMP                                     | Anion | 9.21            | 362.049    | 3.47E-02                                             | ± 3.37E-03 | 3.44E-02 | ± 5.77E-03 | 2.75E-02 | ± 4.53E-03 |
| GTP                                     | Anion | 11.44           | 521.983    | 4.40E-02                                             | ± 3.39E-03 | 4.46E-02 | ± 6.23E-03 | 8.43E-02 | ± 8.45E-03 |
| Heptanoic acid                          | Anion | 8.55            | 129.091    | 3.10E-02                                             | ± 4.42E-03 | 2.38E-02 | ± 6.33E-03 | 3.05E-02 | ± 2.78E-03 |
| Hexanoic acid                           | Anion | 9.00            | 115.076    | 5.40E-02                                             | ± 6.64E-03 | 4.13E-02 | ± 9.30E-03 | 5.05E-02 | ± 1.61E-03 |
| IMP                                     | Anion | 9.56            | 347.038    | 1.35E-02                                             | ± 1.15E-03 | 1.20E-02 | ± 7.59E-04 | 5.73E-03 | ± 5.43E-04 |
| Isobutyric acid                         | Anion | 9.89            | 87.045     | 5.86E-02                                             | ± 4.96E-03 | 5.06E-02 | ± 7.52E-03 | 5.78E-02 | ± 2.28E-03 |
| Isocitric acid                          | Anion | 29.06           | 191.015    | 1.53E-02                                             | ± 4.02E-03 | 9.20E-03 | ± 2.81E-03 | 1.18E-02 | ± 2.76E-03 |
| Lactic acid                             | Anion | 10.76           | 89.024     | 4.43E-01                                             | ± 3.33E-02 | 3.68E-01 | ± 3.96E-02 | 4.93E-01 | ± 4.42E-02 |
| Lauric acid                             | Anion | 7.60            | 199.169    | 4.13E-02                                             | ± 8.40E-04 | 3.92E-02 | ± 1.40E-03 | 3.46E-02 | ± 2.80E-03 |
| Malic acid                              | Anion | 21.67           | 133.014    | 2.78E-01                                             | ± 1.72E-02 | 1.92E-01 | ± 1.21E-03 | 2.70E-01 | ± 1.07E-02 |
| <i>N</i> -Acetyl- $\beta$ -alanine      | Anion | 8.99            | 130.049    | 5.66E-04                                             | ± 5.76E-05 | 7.87E-04 | ± 1.33E-04 | 8.35E-04 | ± 8.45E-05 |

(Continued on next page)

(Continued)

| Candidate compounds                     | mode  | MT <sup>a</sup> | <i>m/z</i> | Relative Intensity ( $\times 10^{-8}$ ) <sup>b</sup> |            |          |            |          |            |
|-----------------------------------------|-------|-----------------|------------|------------------------------------------------------|------------|----------|------------|----------|------------|
|                                         |       |                 |            | 0 min                                                |            | 10 min   |            | 30 min   |            |
| <i>N</i> -Acetylglucosamine 1-phosphate | Anion | 9.57            | 300.047    | 1.15E-03                                             | ± 6.10E-05 | 7.10E-04 | ± 1.14E-04 | 7.60E-04 | ± 9.03E-05 |
| <i>N</i> -Acetylglucosamine 6-phosphate | Anion | 9.22            | 300.047    | 3.39E-03                                             | ± 1.52E-04 | 8.18E-04 | ± 6.32E-05 | 3.30E-04 | ± 3.17E-05 |
| <i>N</i> -Acetylglucosylamine           | Anion | 5.34            | 219.094    | 2.72E-03                                             | ± 2.41E-04 | 2.28E-03 | ± 8.33E-05 | 2.23E-03 | ± 1.56E-04 |
| <i>N</i> -Acetylglutamic acid           | Anion | 13.23           | 188.055    | 4.70E-01                                             | ± 2.72E-02 | 4.79E-01 | ± 4.09E-02 | 5.58E-01 | ± 4.74E-02 |
| <i>N</i> -Acetylleucine                 | Anion | 7.98            | 172.098    | 7.49E-03                                             | ± 2.58E-04 | 7.44E-03 | ± 3.86E-04 | 6.53E-03 | ± 3.68E-04 |
| <i>N</i> -Acetylmethionine              | Anion | 8.09            | 190.054    | 3.48E-03                                             | ± 3.14E-04 | 3.18E-03 | ± 4.06E-04 | 2.81E-03 | ± 4.21E-04 |
| <i>N</i> -Carbamoylaspartic acid        | Anion | 15.57           | 175.035    | 7.52E-03                                             | ± 1.77E-03 | 6.07E-03 | ± 8.47E-04 | 5.47E-03 | ± 6.88E-04 |
| <i>N</i> -Methylglutamic acid           | Anion | 8.37            | 160.061    | 9.79E-02                                             | ± 2.89E-03 | 1.05E-01 | ± 3.64E-03 | 1.23E-01 | ± 1.64E-02 |
| <i>n</i> -Propionyl CoA <sup>d</sup>    | Anion | 10.15           | 410.562    | 2.06E-03                                             | ± 1.74E-04 | 1.63E-03 | ± 1.65E-04 | 1.23E-03 | ± 1.95E-04 |
| NAD <sup>+</sup>                        | Anion | 6.55            | 662.103    | 1.97E-01                                             | ± 1.20E-02 | 1.84E-01 | ± 8.59E-03 | 2.13E-01 | ± 6.27E-03 |
| NADH                                    | Anion | 8.17            | 664.118    | 2.46E-03                                             | ± 4.05E-04 | 1.56E-03 | ± 3.63E-04 | 2.18E-03 | ± 4.05E-04 |
| NADP <sup>+</sup>                       | Anion | 9.43            | 742.070    | 2.09E-02                                             | ± 1.29E-03 | 2.46E-02 | ± 1.92E-03 | 3.32E-02 | ± 2.05E-03 |
| NADPH <sup>d</sup>                      | Anion | 11.29           | 371.537    | 2.02E-02                                             | ± 3.82E-03 | 1.55E-02 | ± 3.86E-03 | 1.43E-02 | ± 4.04E-03 |
| Norvaline                               | Anion | 5.31            | 116.071    | 5.21E-01                                             | ± 3.35E-02 | 5.07E-01 | ± 5.69E-02 | 5.36E-01 | ± 1.64E-02 |
| <i>o</i> -Hydroxybenzoic acid           | Anion | 10.41           | 137.023    | 1.24E-03                                             | ± 1.35E-04 | 1.06E-03 | ± 6.33E-05 | 1.10E-03 | ± 6.94E-05 |
| <i>O</i> -Phosphoserine                 | Anion | 12.29           | 184.001    | 7.65E-03                                             | ± 7.37E-04 | 4.35E-03 | ± 6.59E-04 | 4.53E-03 | ± 5.38E-04 |
| Octanoic acid                           | Anion | 8.33            | 143.107    | 2.71E-02                                             | ± 3.66E-03 | 2.50E-02 | ± 2.82E-03 | 2.31E-02 | ± 1.84E-03 |
| Orotidine 5'-monophosphate              | Anion | 12.57           | 367.017    | 1.67E-02                                             | ± 2.88E-03 | 6.43E-03 | ± 7.47E-04 | 3.47E-03 | ± 1.82E-04 |
| Pelargonic acid                         | Anion | 8.06            | 157.123    | 4.27E-02                                             | ± 5.77E-03 | 3.78E-02 | ± 3.79E-03 | 3.91E-02 | ± 4.09E-03 |
| Phosphoenolpyruvic acid                 | Anion | 21.39           | 166.974    | 5.54E-02                                             | ± 2.04E-03 | 4.65E-02 | ± 3.19E-03 | 4.38E-02 | ± 2.57E-03 |
| Propionic acid                          | Anion | 10.91           | 73.029     | 4.34E-02                                             | ± 3.79E-03 | 3.88E-02 | ± 3.16E-03 | 4.37E-02 | ± 4.00E-03 |
| PRPP                                    | Anion | 16.64           | 388.943    | 3.94E-03                                             | ± 3.50E-04 | 3.45E-03 | ± 5.68E-04 | 3.90E-03 | ± 6.07E-04 |
| Pyridoxamine 5'-phosphate               | Anion | 7.99            | 247.046    | 1.50E-03                                             | ± 1.27E-04 | 1.52E-03 | ± 5.39E-05 | 1.51E-03 | ± 6.80E-05 |
| Pyruvic acid                            | Anion | 12.93           | 87.009     | 1.67E-01                                             | ± 6.59E-03 | 1.78E-01 | ± 1.88E-03 | 1.81E-01 | ± 8.07E-03 |
| Quinic acid                             | Anion | 8.08            | 191.055    | 6.14E-03                                             | ± 4.66E-04 | 5.19E-03 | ± 3.36E-04 | 8.16E-03 | ± 1.72E-03 |
| Ribose 5-phosphate                      | Anion | 10.55           | 229.011    | 1.32E-02                                             | ± 1.61E-03 | 1.30E-02 | ± 7.64E-04 | 1.84E-02 | ± 2.55E-03 |
| Ribulose 5-phosphate                    | Anion | 10.96           | 229.011    | 1.35E-02                                             | ± 5.67E-04 | 1.15E-02 | ± 3.46E-04 | 4.84E-02 | ± 3.02E-03 |
| Sebacic acid                            | Anion | 11.58           | 201.112    | 4.05E-03                                             | ± 7.34E-05 | 2.87E-03 | ± 1.43E-04 | 3.85E-03 | ± 3.95E-04 |
| Sedoheptulose 7-phosphate               | Anion | 9.63            | 289.032    | 2.67E-02                                             | ± 1.08E-03 | 2.22E-02 | ± 4.28E-04 | 5.96E-02 | ± 2.71E-03 |
| Succinic acid                           | Anion | 21.26           | 117.019    | 1.09E-01                                             | ± 1.09E-03 | 7.97E-02 | ± 2.65E-03 | 1.20E-01 | ± 3.67E-03 |
| Thr-Asp                                 | Anion | 10.45           | 233.076    | 1.67E-03                                             | ± 2.47E-04 | 1.65E-03 | ± 1.22E-04 | 2.17E-03 | ± 2.83E-04 |
| Tiglic acid                             | Anion | 9.73            | 99.045     | 2.52E-03                                             | ± 1.34E-04 | 1.70E-03 | ± 4.64E-04 | 2.48E-03 | ± 1.71E-04 |
| <i>trans</i> -Ferlic acid               | Anion | 8.41            | 193.051    | 4.49E-03                                             | ± 3.28E-04 | 4.33E-03 | ± 6.17E-04 | 4.59E-03 | ± 4.51E-04 |
| Trehalose 6-phosphate                   | Anion | 8.41            | 421.074    | 3.34E-03                                             | ± 6.53E-05 | 3.36E-03 | ± 3.17E-04 | 1.04E-02 | ± 9.73E-04 |
| UDP                                     | Anion | 11.66           | 402.993    | 1.28E-01                                             | ± 5.30E-03 | 1.46E-01 | ± 9.25E-03 | 1.37E-01 | ± 1.15E-02 |
| UDP-glucose ; UDP-galactose             | Anion | 8.76            | 565.047    | 1.70E-02                                             | ± 2.96E-04 | 1.60E-02 | ± 7.12E-04 | 3.44E-02 | ± 1.41E-03 |
| UMP                                     | Anion | 9.79            | 323.027    | 5.14E-02                                             | ± 7.76E-03 | 4.89E-02 | ± 1.11E-02 | 3.25E-02 | ± 6.67E-03 |
| Undecanoic acid                         | Anion | 7.75            | 185.154    | 9.47E-03                                             | ± 8.28E-04 | 8.88E-03 | ± 5.94E-04 | 7.75E-03 | ± 8.06E-04 |
| UTP                                     | Anion | 12.58           | 482.960    | 1.54E-01                                             | ± 9.27E-03 | 1.68E-01 | ± 2.24E-02 | 3.02E-01 | ± 3.06E-02 |
| Valeric acid                            | Anion | 9.29            | 101.060    | 5.67E-02                                             | ± 8.51E-03 | 4.62E-02 | ± 1.16E-02 | 5.62E-02 | ± 2.83E-03 |
| $\beta$ -Cyanoalanine                   | Anion | 5.35            | 113.034    | 3.00E-03                                             | ± 6.28E-05 | 2.00E-03 | ± 1.01E-04 | 2.66E-03 | ± 8.76E-05 |

<sup>a</sup>Migration time (min)

<sup>b</sup>The mean values  $\pm$  standard errors for three independent experiments are presented.

<sup>c</sup>The values were calculated from the isotopic peak areas based on carbon isotope ratio.

<sup>d</sup>The ion peaks were detected as  $[M+2H]^{2+}$  or  $[M-2H]^{2-}$ .

N.D., Not determined

Table S3. Changes in selenium compounds after SeMet treatment.

| Candidate compounds                       | mode   | MT <sup>a</sup> | m/z     | Relative intensity ( $\times 10^{-8}$ ) <sup>b</sup> |          |   |          |          |   |          |
|-------------------------------------------|--------|-----------------|---------|------------------------------------------------------|----------|---|----------|----------|---|----------|
|                                           |        |                 |         | 0 min                                                | 10 min   |   | 30 min   |          |   |          |
| 5'-MSeA                                   | Cation | 7.26            | 346.040 | N.D.                                                 | 3.08E-02 | ± | 9.72E-04 | 6.45E-02 | ± | 2.15E-03 |
| 5'-MSeA                                   | Cation | 10.21           | 346.040 | N.D.                                                 | 5.28E-02 | ± | 6.91E-03 | 1.40E-01 | ± | 1.92E-02 |
| 5'-MSeA <sup>c</sup>                      | Anion  | 5.01            | 344.025 | N.D.                                                 | 4.19E-03 | ± | 2.40E-04 | 6.86E-03 | ± | 9.38E-05 |
| GS-Se-SG <sup>c</sup>                     | Anion  | 5.01            | 691.062 | N.D.                                                 | 5.10E-04 | ± | 6.40E-05 | 1.23E-03 | ± | 6.27E-05 |
| GSH-(S-Se)-Cys <sup>c</sup>               | Cation | 11.65           | 475.039 | N.D.                                                 | 9.55E-03 | ± | 5.20E-04 | 7.38E-03 | ± | 3.81E-04 |
| GSH-(S-Se)-Cys                            | Anion  | 7.49            | 473.024 | N.D.                                                 | 5.34E-03 | ± | 4.11E-04 | 3.26E-03 | ± | 7.82E-05 |
| GSH-(S-Se)-Hcy <sup>c</sup>               | Cation | 11.11           | 489.054 | N.D.                                                 | 6.59E-02 | ± | 4.41E-03 | 1.35E-01 | ± | 5.75E-03 |
| GSH-(S-Se)-Hcy                            | Anion  | 7.08            | 487.040 | N.D.                                                 | 5.28E-02 | ± | 4.60E-03 | 9.68E-02 | ± | 5.06E-03 |
| Hcy-(S-Se)-Cys <sup>c</sup>               | Cation | 10.21           | 302.990 | N.D.                                                 | 5.24E-03 | ± | 7.84E-04 | 6.18E-03 | ± | 2.23E-04 |
| Hcy-(S-Se)-Hcy <sup>c</sup>               | Cation | 9.72            | 317.005 | N.D.                                                 | 1.47E-02 | ± | 2.97E-03 | 3.15E-02 | ± | 2.10E-03 |
| Hcy-(S-Se)-Hcy                            | Anion  | 5.36            | 314.993 | N.D.                                                 | 3.33E-03 | ± | 1.07E-03 | 3.89E-03 | ± | 3.40E-04 |
| Hcy-(Se-Se)-Cys <sup>c</sup>              | Cation | 10.21           | 350.933 | N.D.                                                 | 2.04E-03 | ± | 4.61E-04 | 8.07E-03 | ± | 2.63E-04 |
| Hcy-(Se-Se)-Hcy <sup>c</sup>              | Cation | 9.73            | 364.950 | N.D.                                                 | 6.53E-03 | ± | 7.78E-04 | 6.76E-02 | ± | 3.01E-03 |
| Hcy-(Se-Se)-Hcy                           | Anion  | 5.36            | 362.935 | N.D.                                                 |          |   | N.D.     | 5.59E-03 | ± | 3.01E-04 |
| Hcy-(Se-Se)-Hcy                           | Anion  | 5.76            | 362.935 | N.D.                                                 |          |   | N.D.     | 1.23E-03 | ± | 8.36E-05 |
| Methaneselenol                            | Anion  | 5.02            | 94.939  | N.D.                                                 | 6.01E-04 | ± | 3.16E-05 | 1.23E-03 | ± | 5.96E-05 |
| Methaneselenol <sup>c</sup>               | Anion  | 5.35            | 94.940  | N.D.                                                 | 3.05E-02 | ± | 1.63E-03 | 1.93E-02 | ± | 5.71E-04 |
| Se-AdoHcy <sup>c</sup>                    | Cation | 8.87            | 433.072 | N.D.                                                 | 1.46E-02 | ± | 2.87E-03 | 1.98E-02 | ± | 2.69E-03 |
| Se-AdoHcy                                 | Anion  | 5.35            | 431.058 | N.D.                                                 | 6.88E-03 | ± | 6.90E-04 | 9.00E-03 | ± | 6.03E-04 |
| Se-AdoMet <sup>c</sup>                    | Cation | 7.26            | 447.088 | N.D.                                                 | 1.27E-01 | ± | 1.84E-03 | 2.83E-01 | ± | 8.69E-03 |
| Se-AdoMet                                 | Anion  | 5.01            | 445.074 | N.D.                                                 | 7.28E-04 | ± | 8.33E-05 | 1.17E-03 | ± | 2.13E-05 |
| Se-Cystathionine <sup>c</sup>             | Cation | 9.97            | 271.018 | N.D.                                                 | 2.37E-02 | ± | 2.42E-03 | 2.51E-02 | ± | 6.72E-04 |
| SeMet <sup>c</sup>                        | Cation | 10.82           | 198.002 | N.D.                                                 | 3.11E+00 | ± | 1.50E-01 | 1.73E+00 | ± | 7.21E-02 |
| SeMet                                     | Anion  | 5.35            | 195.987 | N.D.                                                 | 1.55E-01 | ± | 8.68E-03 | 9.36E-02 | ± | 3.66E-03 |
| $\gamma$ -Glu-Cys-(S-Se)-Cys <sup>c</sup> | Anion  | 7.57            | 416.001 | N.D.                                                 | 1.41E-03 | ± | 1.36E-05 | 7.10E-04 | ± | 5.85E-05 |
| $\gamma$ -Glu-Cys-(S-Se)-Hcy <sup>c</sup> | Cation | 10.87           | 432.032 | N.D.                                                 | 1.18E-02 | ± | 5.50E-04 | 1.50E-02 | ± | 4.74E-04 |
| $\gamma$ -Glu-Cys-(S-Se)-Hcy              | Anion  | 7.20            | 430.017 | N.D.                                                 | 3.06E-03 | ± | 4.90E-05 | 4.67E-03 | ± | 2.20E-04 |

<sup>a</sup>Migration time (min)<sup>b</sup>The mean values  $\pm$  standard errors for three independent experiments are presented.<sup>c</sup>The data were plotted in Fig. 2e.

N.D., Not determined
